# Supplementary material for: Experimental warming influences species abundances in a Drosophila host community through direct effects on species performance rather than altered competition and parasitism
Source: PubMed Central journal article supplement (PMC7877627; doi:10.1371/journal.pone.0245029), 2021-02-11

**S1 Fig.** Transparent plastic boxes (47cm x 30cm x 27.5cm) with three ventilation holes (15 cm in diameter) covered with insect-proof nylon mesh used as experimental unit allowing parasitoids to attack one of the three experimental vials containing 2-days-old host larvae for 72h

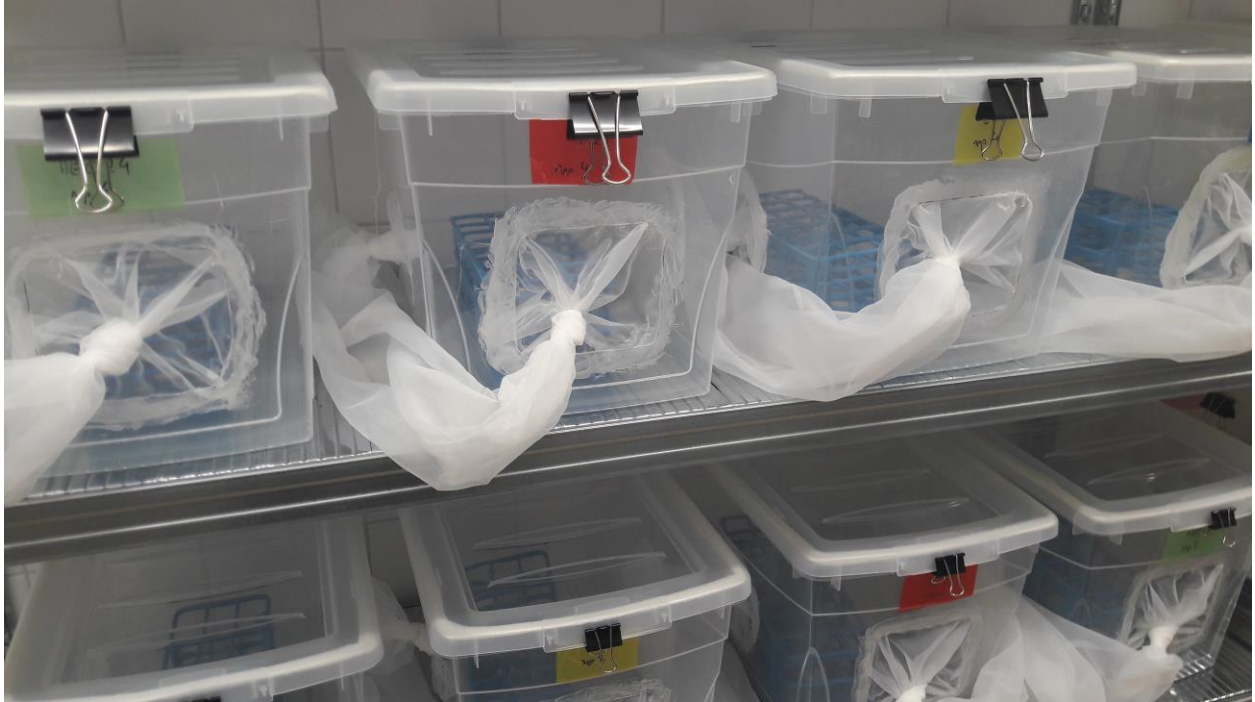

Supplement: pone.0245029.s001.pdf [file pone.0245029.s001.pdf]
