# Supplementary material for: Experimental warming influences species abundances in a Drosophila host community through direct effects on species performance rather than altered competition and parasitism
Source: PubMed Central journal article supplement (PMC7877627; doi:10.1371/journal.pone.0245029), 2021-02-11

**S2 Fig.** *Drosophila birchii*, *D. pseudoananassae*, and *D. sulfurigaster* pupae photography for morphological identification. Not in scale (photo credit to Jinlin Chen)

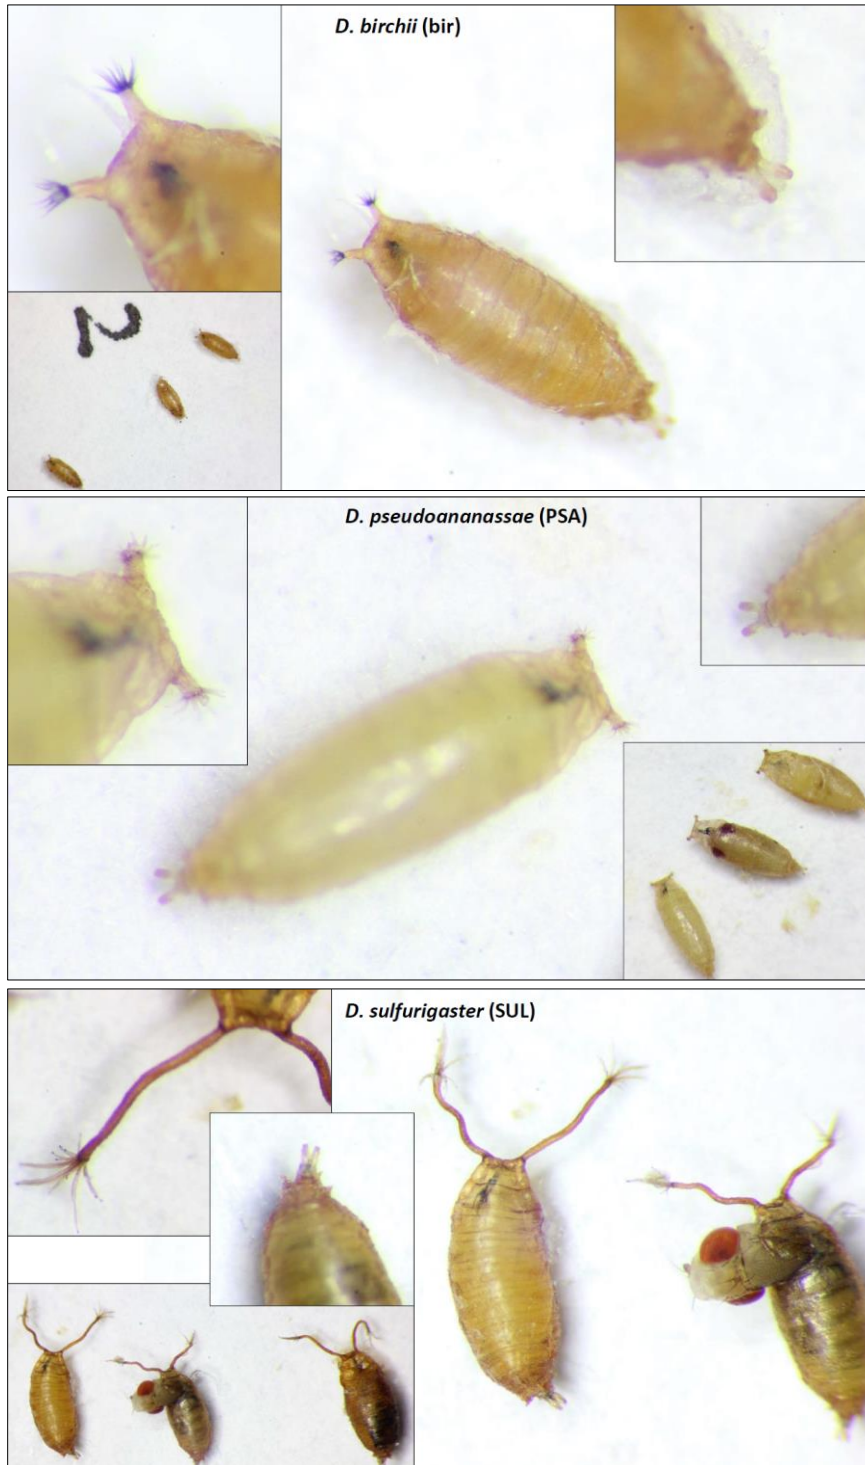

Supplement: pone.0245029.s002.pdf [file pone.0245029.s002.pdf]
