# Supplementary material for: Experimental warming influences species abundances in a Drosophila host community through direct effects on species performance rather than altered competition and parasitism
Source: PubMed Central journal article supplement (PMC7877627; doi:10.1371/journal.pone.0245029), 2021-02-11

**S3 Fig.** Interactive effect of competition with host species, and with presence of parasitoids on mean host body mass. See Figure 1 for detailed description of the treatments. The small points represent the values from each block and each host-parasitoid pair, the large points represent the grand mean, and the bars represent standard errors of the means. Blue: ambient temperature (23°C), red: warming treatment (27°C)

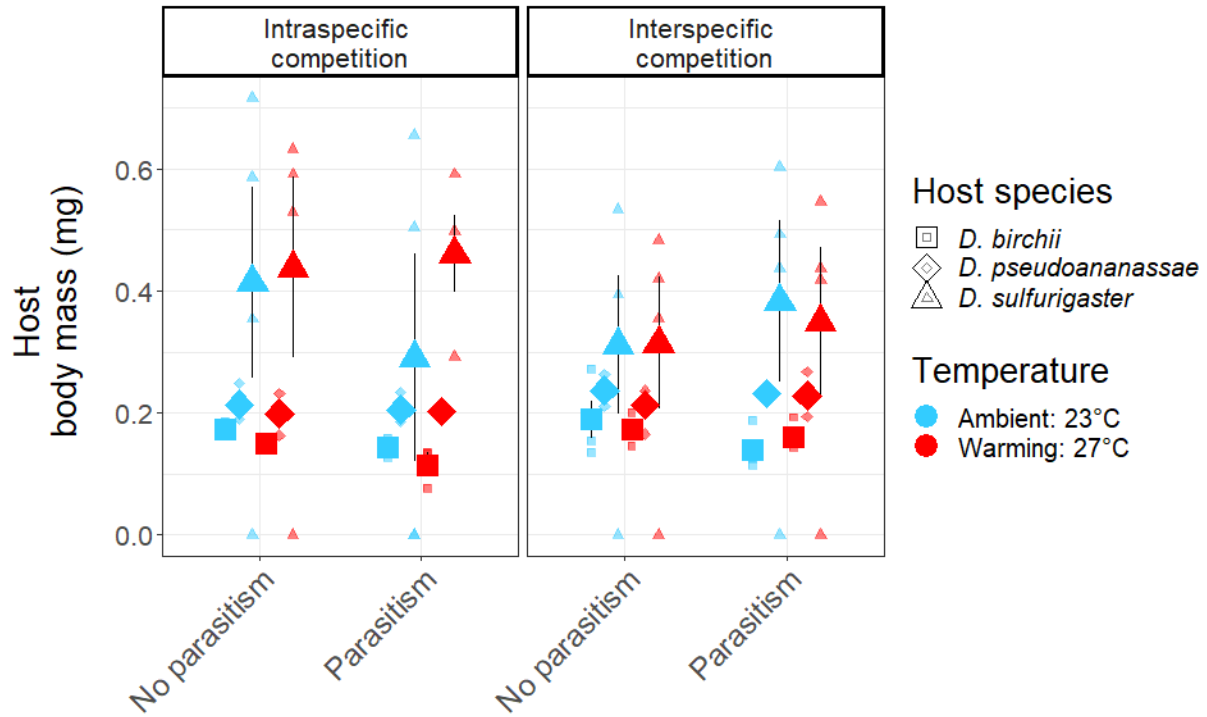

Supplement: pone.0245029.s003.pdf [file pone.0245029.s003.pdf]
