# Supplementary material for: Experimental warming influences species abundances in a Drosophila host community through direct effects on species performance rather than altered competition and parasitism
Source: PubMed Central journal article supplement (PMC7877627; doi:10.1371/journal.pone.0245029), 2021-02-11
Supplement: pone.0245029.s004.pdf [file pone.0245029.s004.pdf]

**S1 Table.** Mean number of offspring per species with 10, 30, 60, 90 or 180 adult hosts

(1:1 sex ratio) in a 5 mL host-media glass vial. Choice of host number in the main experiment was based on these preliminary data to correspond to strong competition for all host species.

|                           | <b>Number of adult hosts</b> | <b>Mean number of offspring <math>\pm</math> SEM</b> |
|---------------------------|------------------------------|------------------------------------------------------|
| <i>D. birchii</i>         | 10                           | 38 $\pm$ 28                                          |
|                           | 30                           | 45 $\pm$ 9                                           |
|                           | 60                           | 53 $\pm$ 19                                          |
|                           | 90                           | 53 $\pm$ 10                                          |
|                           | 180                          | 40 $\pm$ 17                                          |
| <i>D. pseudoananassae</i> | 10                           | 46 $\pm$ 27                                          |
|                           | 30                           | 90 $\pm$ 31                                          |
|                           | 60                           | 126 $\pm$ 38                                         |
|                           | 90                           | 94 $\pm$ 33                                          |
|                           | 180                          | 107 $\pm$ 75                                         |
| <i>D. sulfurigaster</i>   | 10                           | 40 $\pm$ 35                                          |
|                           | 30                           | 18 $\pm$ 11                                          |
|                           | 60                           | 18 $\pm$ 13                                          |
|                           | 90                           | 35 $\pm$ 27                                          |
|                           | 180                          | 35 $\pm$ 19                                          |
