# Supplementary material for: Experimental warming influences species abundances in a Drosophila host community through direct effects on species performance rather than altered competition and parasitism
Source: PubMed Central journal article supplement (PMC7877627; doi:10.1371/journal.pone.0245029), 2021-02-11
Supplement: pone.0245029.s005.pdf [file pone.0245029.s005.pdf]

**S2 Table.** Number of observations per temperature, treatments (Intraspecific competition:

no interaction between host species; Interspecific competition: direct competition between host species;

Parasitism: intraspecific competition with parasitism; All interactions: interspecific competition with

parasitism), and host species in the whole dataset, and with the reduced dataset used for analyses (excluding

observations with fewer than 10 emerging insects or pupae).

|                                  | <b>Whole dataset</b> | <b>Reduced dataset</b> |
|----------------------------------|----------------------|------------------------|
| <b>23°C</b>                      | 48                   | 41                     |
| <b>27°C</b>                      | 48                   | 42                     |
| <b>Intraspecific competition</b> | 24                   | 21                     |
| <b>Interspecific competition</b> | 24                   | 20                     |
| <b>Parasitism</b>                | 24                   | 21                     |
| <b>All interactions</b>          | 24                   | 21                     |
| <i>D. birchii</i>                | 32                   | 32                     |
| <i>D. pseudoananassae</i>        | 32                   | 32                     |
| <i>D. sulfurigaster</i>          | 32                   | 19                     |
