# Supplementary material for: Experimental warming influences species abundances in a Drosophila host community through direct effects on species performance rather than altered competition and parasitism
Source: PubMed Central journal article supplement (PMC7877627; doi:10.1371/journal.pone.0245029), 2021-02-11
Supplement: pone.0245029.s006.pdf [file pone.0245029.s006.pdf]

**S3 Table.** Table showing the effect of temperature (23°C or 27°C), parasitism (presence or absence), competition between host species (intraspecific or interspecific), host species (n = 3), interactions between terms, and block (n = 4), on host abundances, and host frequencies for the whole dataset (without any deleted observations due to *D. sulfurigaster*). Degrees of freedom (Df) for each F-ratio are given for each factor and for the error. F values are presented with the significance of the effect: (\*\*\*) P < 0.001, (\*\*) P < 0.01, (\*) P < 0.05, (ns) P > 0.05.

|                                   | <b>Df</b> | <b>Host abundance</b> |      | <b>Host frequency</b> |      | <b>Parasitism rate</b> |      |
|-----------------------------------|-----------|-----------------------|------|-----------------------|------|------------------------|------|
| <b>Temperature</b>                | 1         | 0.63                  | (ns) | 0.21                  | (ns) | 5.42                   | *    |
| <b>Parasitism</b>                 | 1         | 8.50                  | **   | 0.00                  | (ns) | -                      | -    |
| <b>Competition</b>                | 1         | 0.11                  | (ns) | 0.00                  | (ns) | 1.25                   | (ns) |
| <b>Host species</b>               | 2         | 27.22                 | ***  | 97.81                 | ***  | 2.75                   | (ns) |
| <b>Parasitoid species</b>         | 1         | -                     | -    | -                     | -    | 2.68                   | (ns) |
| <b>Temperature x Parasitism</b>   | 1         | 0.53                  | (ns) | 0.00                  | (ns) | -                      | -    |
| <b>Temperature x Competition</b>  | 1         | 0.10                  | (ns) | 0.00                  | (ns) | 0.04                   | (ns) |
| <b>Temperature x Host species</b> | 2         | 3.01                  | (ns) | 20.05                 | ***  | -                      | -    |
| <b>Parasitism x competition</b>   | 1         | 1.61                  | (ns) | 0.00                  | (ns) | -                      | -    |
| <b>Host x parasitoid species</b>  | 2         | -                     | -    | -                     | -    | 22.42                  | ***  |
| <b>Block</b>                      | 3         | 1.02                  | (ns) | 0.00                  | (ns) | 1.66                   | (ns) |
| <b>Df error</b>                   |           | 82                    |      | 82                    |      | 76                     |      |
| <b>R<sup>2</sup></b>              |           | 0.74                  |      | 0.05                  |      | 0.10                   |      |
