# Supplementary material for: Experimental warming influences species abundances in a Drosophila host community through direct effects on species performance rather than altered competition and parasitism
Source: PubMed Central journal article supplement (PMC7877627; doi:10.1371/journal.pone.0245029), 2021-02-11
Supplement: pone.0245029.s007.pdf [file pone.0245029.s007.pdf]

**S4 Table.** Summary table for mean ( $\pm$  SD) host abundances (Host ab.), individual host body mass (Host BM), total parasitism rate (PR), and parasitism rates of each parasitoid species (*Asobara* sp. and *Leptopilina* sp.) for each temperature (23 and 27°C), treatments (competition: intra or inter, parasitism: present or absent), and host species (*D. birchii*, *D. pseudoananassae*, *D. sulfurigaster*).

| Temp | Comp  | Para | Host sp.          | Host ab. | $\pm$ SD | Host BM | $\pm$ SD | PR   | $\pm$ SD | PR of <i>Asb.</i> | $\pm$ SD | PR of <i>Lept.</i> | $\pm$ SD |
|------|-------|------|-------------------|----------|----------|---------|----------|------|----------|-------------------|----------|--------------------|----------|
| 23°C | intra | no   | <i>D. birchii</i> | 114      | 28       | 0.174   | 0.012    | -    | -        | -                 | -        | -                  | -        |
|      |       |      | <i>D. pseud.</i>  | 106      | 52       | 0.214   | 0.025    | -    | -        | -                 | -        | -                  | -        |
|      |       |      | <i>D. sulfu.</i>  | 32       | 4        | 0.651   | 0.092    | -    | -        | -                 | -        | -                  | -        |
|      |       | yes  | <i>D. birchii</i> | 57       | 70       | 0.143   | 0.022    | 0.30 | 0.30     | 0.29              | 0.29     | 0.01               | 0.01     |
|      |       |      | <i>D. pseud.</i>  | 70       | 69       | 0.205   | 0.021    | 0.30 | 0.18     | 0.05              | 0.09     | 0.26               | 0.18     |
|      |       |      | <i>D. sulfu.</i>  | 20       | 9        | 0.579   | 0.106    | 0    | 0        | 0                 | 0        | 0                  | 0        |
|      | inter | no   | <i>D. birchii</i> | 109      | 49       | 0.190   | 0.061    | -    | -        | -                 | -        | -                  | -        |
|      |       |      | <i>D. pseud.</i>  | 119      | 68       | 0.237   | 0.023    | -    | -        | -                 | -        | -                  | -        |
|      |       |      | <i>D. sulfu.</i>  | 46       | 16       | 0.416   | 0.108    | -    | -        | -                 | -        | -                  | -        |
|      |       | yes  | <i>D. birchii</i> | 45       | 14       | 0.139   | 0.034    | 0.31 | 0.14     | 0.17              | 0.12     | 0.14               | 0.12     |
|      |       |      | <i>D. pseud.</i>  | 65       | 64       | 0.232   | 0.010    | 0.26 | 0.19     | 0.04              | 0.04     | 0.22               | 0.17     |
|      |       |      | <i>D. sulfu.</i>  | 11       | 6        | 0.465   | 0.039    | 0.28 | 0.24     | 0.28              | 0.24     | 0.00               | 0.00     |
| 27°C | intra | no   | <i>D. birchii</i> | 69       | 20       | 0.151   | 0.004    | -    | -        | -                 | -        | -                  | -        |
|      |       |      | <i>D. pseud.</i>  | 184      | 36       | 0.199   | 0.030    | -    | -        | -                 | -        | -                  | -        |
|      |       |      | <i>D. sulfu.</i>  | 37       | 28       | 0.612   | 0.029    | -    | -        | -                 | -        | -                  | -        |
|      |       | yes  | <i>D. birchii</i> | 26       | 25       | 0.115   | 0.034    | 0.08 | 0.08     | 0.06              | 0.09     | 0.02               | 0.04     |
|      |       |      | <i>D. pseud.</i>  | 170      | 13       | 0.202   | 0.014    | 0.11 | 0.09     | 0.00              | 0.01     | 0.10               | 0.09     |
|      |       |      | <i>D. sulfu.</i>  | 31       | 31       | 0.517   | 0.067    | 0.28 | 0.36     | 0.28              | 0.36     | 0.00               | 0.00     |
|      | inter | no   | <i>D. birchii</i> | 74       | 25       | 0.173   | 0.023    | -    | -        | -                 | -        | -                  | -        |
|      |       |      | <i>D. pseud.</i>  | 261      | 48       | 0.213   | 0.032    | -    | -        | -                 | -        | -                  | -        |
|      |       |      | <i>D. sulfu.</i>  | 37       | 2        | 0.388   | 0.046    | -    | -        | -                 | -        | -                  | -        |
|      |       | yes  | <i>D. birchii</i> | 27       | 11       | 0.161   | 0.022    | 0.25 | 0.14     | 0.16              | 0.10     | 0.08               | 0.06     |
|      |       |      | <i>D. pseud.</i>  | 130      | 33       | 0.229   | 0.031    | 0.16 | 0.10     | 0.02              | 0.02     | 0.14               | 0.10     |
|      |       |      | <i>D. sulfu.</i>  | 21       | 11       | 0.482   | 0.091    | 0.16 | 0.16     | 0.16              | 0.16     | 0.00               | 0.00     |
